# Supplementary material for: Ontogenetic foraging activity and feeding selectivity of the Brazilian endemic parrotfish Scarus zelindae
Source: PeerJ. 2016 Oct 12;4:e2536. doi: 10.7717/peerj.2536 (PMC5068395; doi:10.7717/peerj.2536)
Supplement: Data S1 [file peerj-04-2536-s001.xls]

## Sheet: Plan1
	Life phase	Schooling pattern		EAM	Siderastrea	Sponge	Corraline algae	Algae folhosa	Dead coral	Water collumn
	Macho terminal	Schooling	1899-12-31 05:00:00	86	0	0	3	0	0	0
	Macho terminal	Schooling	1899-12-31 05:00:00	37	0	0	0	0	0	0
	Macho terminal	Schooling	1899-12-31 03:30:00	40	0	2	4	0	0	0
	Macho Terminal	Solitary	5	42	0	0	0	0	0	0
	Macho Terminal	Schooling	5	103	0	0	4	0	0	0
	Macho Terminal	Solitary	5	71	0	3	0	0	0	0
	Macho Terminal	Solitary	5	105	0	0	0	0	0	0
	Macho Terminal	Solitary	5	48	0	0	0	29	0	0
	Macho Terminal	Solitary	1899-12-31 05:22:00	65	4	0	16	31	0	0
	Macho Terminal	Solitary	1899-12-31 05:17:00	63	0	8	9	0	0	0
	Macho Terminal		1899-12-31 05:00:00	45	3	0	2	0	0	0
	Macho Terminal		1899-12-31 05:00:00	80	5	0	2	0	0	0
	Macho Terminal		1899-12-31 04:00:00	50	0	0	3	0	0	0
	Macho Terminal		1899-12-31 05:00:00	88	0	0	8	0	0	0
	Jovem	Schooling	1899-12-31 05:00:00	152	0	12	0	0	0	0
	Jovem	Schooling	1899-12-31 05:00:00	98	0	18	0	0	0	0
	Jovem	Schooling	1899-12-31 02:00:00	35	0	0	0	0	0	0
	Jovem	Schooling	1899-12-31 01:00:00	49	0	0	0	0	0	0
	Jovem	Pair	1899-12-31 02:44:00	66	0	0	0	4	0	0
	Jovem	Solitary	1899-12-31 05:00:00	93	0	0	6	0	0	0
	Jovem		1899-12-31 02:00:00	151	0	0	0	0	0	0
	Jovem		1899-12-31 05:00:00	99	0	0	0	0	0	0
	Jovem		1899-12-31 04:00:00	158	0	0	0	0	0	0
	Adulto inicial	Schooling	1899-12-31 03:00:00	28	0	0	0	0	0	0
	Adulto inicial	Schooling	1899-12-31 05:00:00	86	0	1	0	1	1	0
	Adulto inicial	Schooling	1899-12-31 05:00:00	103	0	2	2	0	1	0
	Adulto inicial	Schooling	1899-12-31 03:00:00	50	0	0	0	0	0	0
	Adulto inicial	Pair	1899-12-31 02:00:00	42	0	0	0	0	0	0
	Adulto inicial	Solitary	5	75	1	0	1	0	0	0
	Adulto inicial	Pair	5	59	0	0	2	0	0	3
	Adulto inicial	Pair	1	10	0	0	0	0	0	0
	Adulto inicial	Pair	1899-12-31 04:00:00	65	0	0	0	0	0	0
	Adulto inicial	Schooling	1899-12-31 03:00:00	45	0	0	0	0	0	0
	Adulto inicial	Solitary	1899-12-31 05:00:00	108	0	30	0	0	0	0
	Adulto inicial	Schooling	1899-12-31 03:20:00	57	3	5	0	0	0	0
	Adulto inicial	Pair	1899-12-31 03:25:00	51	0	8	0	0	0	0
	Adulto inicial	Pair	5	75	0	0	15	0	0	0
	Adulto inicial	Solitary	1899-12-31 04:13:00	70	0	19	0	0	0	0
	Adulto inicial	Pair	1899-12-31 03:00:00	35	0	17	0	0	0	0
	Adulto inicial	Pair	1899-12-31 04:09:00	117	0	0	0	0	0	0
	Adulto inicial	Pair	1899-12-31 03:23:00	81	0	0	0	0	0	0
	Adulto inicial		1899-12-31 03:00:00	51	0	0	0	0	0	0
	Adulto inicial		1899-12-31 02:00:00	30	0	0	0	0	0	0
	Adulto inicial		1899-12-31 03:00:00	76	0	0	6	0	0	0
	Adulto inicial		1899-12-31 04:00:00	120	0	0	3	0	0	0

## Sheet: TOTAL
			EAM	Siderastrea	Sponge	Corraline algae	Algae folhosa	Dead coral	Water collumn
	Jovem	5	152	0	12	0	0	0	0	164
	Jovem	5	98	0	18	0	0	0	0	116
	Jovem	2	35	0	0	0	0	0	0	35
	Jovem	1	49	0	0	0	0	0	0	49
	Jovem	2.4	66	0	0	0	4	0	0	70
	Jovem	5	34	0	0	6	0	0	0	40
	Jovem	2	151	0	0	0	0	0	0	151
	Jovem	5	99	0	0	0	0	0	0	99
	Jovem	4	158	0	0	0	0	0	0	158
	Adulto inicial	1899-12-31 03:00:00	3	28	0	0	0	0	0	0	0	28	9.33333
	Adulto inicial	1899-12-31 05:00:00	5	86	0	1	0	1	1	0	0	89	17.8
	Adulto inicial	1899-12-31 05:00:00	5	103	0	2	2	0	1	0	0	108	21.6
	Adulto inicial	1899-12-31 03:00:00	3	50	0	0	0	0	0	0	0	50	16.6667
	Adulto inicial	1899-12-31 02:00:00	2	42	0	0	0	0	0	0	0	42	21
	Adulto inicial	1899-12-31 05:00:00	5	75	1	0	1	0	0	0	0	77	15.4
	Adulto inicial	1899-12-31 05:00:00	5	59	0	0	2	0	0	3	3	67	13.4
	Adulto inicial	1899-12-31 01:00:00	1	10	0	0	0	0	0	0	0	10	10
	Adulto inicial	1899-12-31 04:00:00	4	65	0	0	0	0	0	0	0	65	16.25
	Adulto inicial	1899-12-31 03:00:00	3	45	0	0	0	0	0	0	0	45	15
	Adulto inicial	1899-12-31 05:00:00	5	108	0	30	0	0	0	0	0	138	27.6
			41	671	1	33	5	1	2	3	3
				16.3659	0.0243902	0.804878	0.121951	0.0243902	0.0487805	0.0731707
	Macho terminal	1899-12-31 05:00:00	5	86	0	0	3	0	0	0	0	89	17.8
	Macho terminal	1899-12-31 05:00:00	5	37	0	0	0	0	0	0	0	37	7.4
	Macho terminal	1899-12-31 03:30:00	3	40	0	2	4	0	0	0	0	46	15.3333
	Macho Terminal	1899-12-31 05:00:00	5	42	0	0	0	0	0	0	0	42	8.4
	Macho Terminal	1899-12-31 05:00:00	5	103	0	0	4	0	0	0	0	107	21.4
			23	308	0	2	11	0	0	0	0
				13.3913	0	0.0869565	0.478261	0	0	0	0

## Sheet: joven
	32.8
	23.2
	17.5
	49
	8
	26.1
	15.6467

## Sheet: adulto inicial 
	9.33333
	17.8
	21.6
	16.6667
	21
	15.4
	13.4
	10
	16.25
	15
	27.6
	16.7318
	5.26631

## Sheet: macho terminal 
	17.8
	7.4
	15.3333
	8.4
	21.4
	14.0667
	6.03895

## Sheet: Geral Bites 
			Bites min	SE
		Juvenile	32.7185	5.6
		IP	19.26	5.2
		TP	16.7189	6.1

## Sheet: Bites per substratum 
		EAM	Siderastrea	Sponge	Corraline algae	Algae folhosa	Dead coral	Water collumn
	Juvenile	65.1818	0.181818	3.72727	1.31818	0.0454545	0.0909091	0.136364
	IP	65.1818	0.181818	3.72727	1.31818	0.0454545	0.0909091	0.136364
	TP	51.6667	0.8	1.66667	3.4	4	0	0	0
