# Supplementary material for: Ontogenetic foraging activity and feeding selectivity of the Brazilian endemic parrotfish Scarus zelindae
Source: PeerJ. 2016 Oct 12;4:e2536. doi: 10.7717/peerj.2536 (PMC5068395; doi:10.7717/peerj.2536)
Supplement: Data S2 [file peerj-04-2536-s002.xls]

## Sheet: Plan1
Transect 1	Transect 2	Transect 3	Transect 4	Transect 5	Transect 6	Transect 7	Transect 8	Transect 9	Transect 10	Transect 11	Transect 12	Transect 13	Transect 14	Transect 15	Transect 16	Transect 17	Transect 18	Transect 19	Transect 20
folhosa	cal encrust	montastrea	cal encrust	folhosa	turf	turf	turf	cal encrust	areia	Areia	Areia	Calcaria incrustante	Rocha	Areia	Rocha	EAM	EAM	Rocha	Esponja
folhosa	cal encrust	montastrea	cal encrust	turf	turf	turf	cal encrust	coral duro - s. stellata	areia	Rocha	Areia	Rocha	Rocha	Calcaria incrustante	EAM	EAM	A.C	C (M. cavernosa)	Alga folhosa
folhosa	turf	turf	turf	cal encrust	turf	cal encrust	areia	turf	areia	Areia	Calcaria incrustante	Calcaria incrustante	Rocha	Calcaria incrustante	EAM	EAM	A.C	Alga folhosa	Esponja
cal encrust	cal encrust	esponja	filamentosa vermelha	cal encrust	areia	turf	turf	turf	areia	Turf	Calcaria incrustante	Areia	Rocha	coral mole	EAM	EAM	A.C	C (S. stellata)	EAM
cal encrust	turf	coral duro - s. stellata	turf	esponja	esponja	cal encrust	turf	areia	cal encrust	Areia	Calcaria incrustante	Rocha	Areia	Calcaria incrustante	EAM	EAM	Rocha	EAM	EAM
folhosa	esponja	cal encrust	cal encrust	cal encrust	coral duro - s. stellata	turf	turf	turf	cal encrust	Rocha	Esponja	Turf	Calcaria incrustante	Calcaria incrustante	EAM	Rocha	C (M. cavernosa)	C (morto)	EAM
areia	esponja	cal encrust	esponja	turf	scolymia wellsi	turf	cal encrust	areia	coral duro - s. stellata	Areia	Rocha	Rocha	Areia	Calcaria incrustante	Alga calcárea	Esponja	Rocha	Alga folhosa	Rocha
cal encrust	esponja	turf	turf	folhosa	turf	turf	turf	areia	esponja	Rocha	Calcaria incrustante	Calcaria incrustante	Areia	Rocha	EAM	Rocha	C (M. cavernosa)	Areia	Alga folhosa
areia	coral duro - s. stellata	ouriço	turf	turf	turf	turf	turf	cal encrust	esponja	Calcaria incrustante	Calcaria incrustante	Calcaria articulada	Rocha	Rocha	Rocha	Rocha	Esponja	Alga folhosa	Alga folhosa
folhosa	folhosa	coral duro - s. stellata	montastrea	turf	esponja	cal encrust	cal encrust	turf	esponja	Rocha	Calcaria articulada	Areia	Calcaria articulada	Rocha	C (S. stellata)	EAM	C (M. cavernosa)	Alga folhosa	EAM
cal encrust	folhosa	turf	turf	agarícia humilis	turf	turf	cal encrust	turf	esponja	Areia	Areia	Esponja	Turf	Rocha	EAM	C (S. stellata)	C (M. cavernosa)	EAM	EAM
folhosa	esponja	turf	turf	coral duro - s. stellata	turf	turf	filamentosa vermelha	turf	esponja	Calcaria articulada	Calcaria incrustante	Rocha	Rocha	Rocha	Rocha	EAM	EAM	Esponja	Alga folhosa
areia	folhosa	turf	cal encrust	turf	areia	turf	turf	filamentosa vermelha	filamentosa vermelha	Calcaria articulada	Rocha	Rocha	Areia	Rocha	EAM	EAM	EAM	Alga folhosa	Esponja
cal encrust	coral duro - s. stellata	esponja	turf	cal encrust	turf	turf	cal encrust	areia	turf	Turf	Rocha	Areia	Rocha	Rocha	EAM	EAM	EAM	Rocha	Areia
esponja	turf	cal encrust	turf	acídia	turf	coral duro - s. stellata	turf	areia	turf	Areia	Rocha	Calcaria incrustante	Rocha	Rocha	Esponja	Rocha	C (M. cavernosa)	Alga folhosa	Areia
folhosa	coral duro - s. stellata	porites astreoides	cal encrust	cal encrust	turf	turf	turf	areia	turf	Areia	Areia	Calcaria incrustante	Rocha	Rocha	C (M. cavernosa)	Esponja	C (S. stellata)	Areia	Areia
folhosa	turf	esponja	folhosa	cal encrust	turf	turf	cal encrust	turf	turf	Areia	Areia	Rocha	Rocha	Rocha	EAM	I (ouriço)	EAM	EAM	Areia
turf	areia	esponja	folhosa	cal encrust	montastrea	cal encrust	turf	turf	turf	Areia	Rocha	Rocha	Calcaria incrustante	Rocha	Rocha	EAM	EAM	Areia	Areia
areia	turf	cal encrust	filamentosa vermelha	cal encrust	cal encrust	esponja	turf	turf	turf	Areia	Rocha	Rocha	Calcaria incrustante	Rocha	EAM	C (A. agaricites)	Alga calcárea	Esponja	Areia
areia	turf	cal encrust	esponja	acídia	turf	turf	turf	turf	turf	Areia	Rocha	Rocha	Rocha	Rocha	EAM	EAM	Rocha	Areia	Areia
	Macroalgae	EAM	Calcareous algae	Sand	Sponge	Hard coral	Urchin	Filamentous algae	Rock		20
Transect 1	8	1	5	5	1	0	0	0	0		20
Transect 2	3	6	3	1	4	3	0	0	0		20
Transect 3	0	5	5	0	4	5	1	0	0		20
Transect 4	2	8	5	0	2	1	0	2	0		20
Transect 5	2	5	9	0	2	2	0	0	0		20
Transect 6	0	12	1	2	2	3	0	0	0		20
Transect 7	0	14	4	0	1	1	0	0	0		20
Transect 8	0	12	6	1	0	0	0	1	0		20
Transect 9	0	10	2	6	0	1	0	1	0		20
Transect 10	0	7	2	4	5	1	0	1	0		20
Transect 11	0	2	7	11	0	0	0	0	0		20
Transect 12	3	5	6	5	1	0	0	0	0		20
Transect 13	0	10	6	3	1	0	0	0	0		20
Transect 14	1	5	4	4	5	1	0	0	0		20
Transect 15	0	13	5	1	0	1	0	0	0		20
Transect 16	0	12	1	0	1	2	0	0	4		20
Transect 17	0	11	0	0	2	2	1	0	4		20
Transect 18	0	6	4	0	1	6	0	0	3		20
Transect 19	6	3	0	4	2	3	0	0	2		20
Transect 20	4	5	0	7	3	0	0	0	1
	29	152	75	54	37	32	2	5	14
